# Supplementary material for: Granular chain escape from a pore in a wall in the presence of particles on one side: a comparison to polymer translocation
Source: Royal Society of Chemistry journal article supplement (doi:10.1039/c8sm00790j), 2018-01-01
Supplement: c8sm00790j1.pdf [file c8sm00790j1.pdf]

### Supplementary information to:

#### *Granular chain escape from a pore in a wall in the presence of particles in one side: Comparison to polymer translocation*

Fereshteh Samadi Taheri<sup>1</sup>, Hossein Fazli<sup>1</sup>, Masao Doi<sup>2</sup>, Mehdi Habibi<sup>3</sup>

<sup>1</sup> Department of Physics, Institute for Advanced Studies in Basic Sciences (IASBS), Zanjan 45137-66731, Iran.

<sup>2</sup> Center of Soft Matter Physics and its Applications, Beihang University, Beijing, China.

<sup>3</sup> Laboratory of Physics and Physical Chemistry of Foods, Wageningen University, Wageningen, The Netherlands.

Simulation results show that the translocation exponent depends on the persistence length ( $P_l$ ) of the polymer (Fig. S1) and smaller exponents will be achieved when the polymer is completely flexible with  $P_l$  of one monomer compared to  $P_l$  of ten monomers. The ratio of the pore to the diameter of a single monomer ( $s/\sigma$ ) is a geometrical parameter that can affect the translocation exponent too. Our simulation results for the translocation exponent as a function of  $s/\sigma$  does not show any explicit dependency since the differences are in the range of error bars. However when we plot the translocation exponent as a function of the ratio of persistence length over the size of pore ( $P_l/s$ ) most of the data points obey an increasing trend for the exponent  $\alpha$  from about 2.6 to 3.1 by increasing the  $P_l/s$  from 0.2 to about 7, although fluctuations in the range of error bars are observed (Fig. S3).

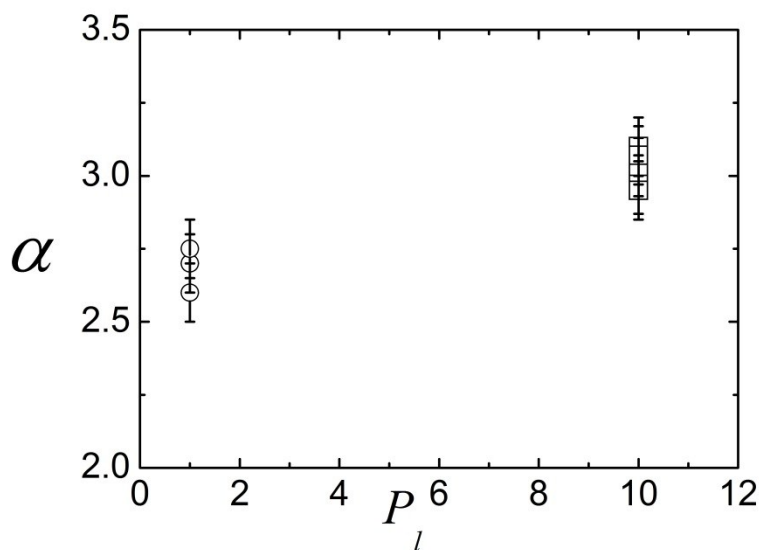

Fig S1: Simulation results for the translocation exponent  $\alpha$  as a function of the persistence length of polymer  $P_l$  for different values of  $s/\sigma$ . The persistence length is shown in terms of the number of monomers.

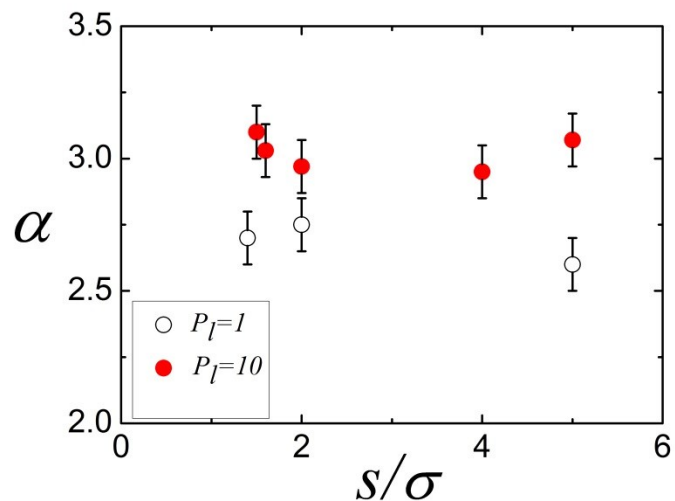

Fig S2: Simulation results for the translocation exponent  $\alpha$  as a function of  $s/\sigma$  for two different persistence lengths ( $P_l$ ) of 1 monomer and 10 monomers.

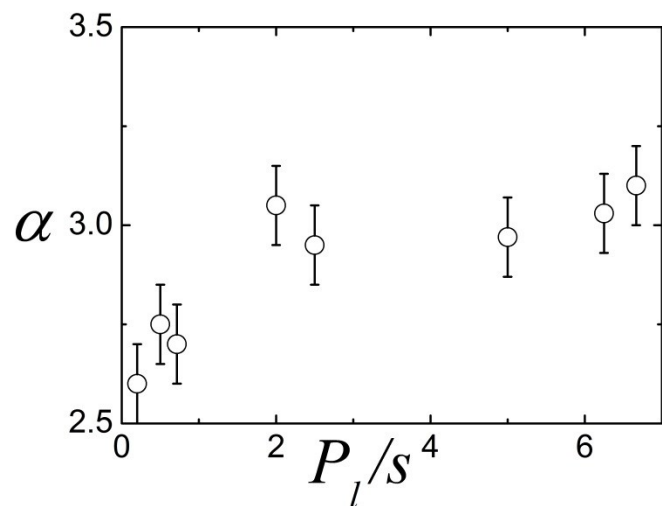

Fig S3: Simulation results for the translocation exponent  $\alpha$  as a function of  $P_l/s$ .
